# Supplementary material for: Landscape Genetics and Species Delimitation in the Andean Palm Rocket Frog (Aromobatidae, Rheobates)
Source: Hindawi journal article supplement (doi:10.1155/2022/6774225), 2022-02-09
Supplement: f1 [file 6774225.f1.pdf]

## Supporting information

### Landscape genetics and species delimitation in the Andean Palm Rocket Frog (*Aromobatidae*, *Rheobates*).

Gabrielle Genty<sup>1\*</sup>, Carlos E. Guarnizo<sup>1</sup>, Juan P. Ramírez<sup>1,2</sup>, Lucas S. Barrientos<sup>1,3</sup>, Andrew J. Crawford<sup>1</sup>

<sup>1</sup> Department of Biological Sciences, Universidad de los Andes, Bogotá, 111711, Colombia.

<sup>2</sup> Department of Biology, San Diego State University, San Diego, CA, 92182, USA.

<sup>3</sup> Universidad del Rosario, Departamento de Biología, Bogotá, 111221, Colombia.

The Supplementary Materials contain sample data, primers used for DNA sequence amplification, evolutionary genetic analyses performed, and substitution models selected for each gene. We provide figures for the maximum likelihood (ML) phylogenetic inference trees using RAxML applied to either the concatenated mitochondrial genes or nuclear genes only, and species tree analysis applied to all genes using StarBEAST2.

Supporting material includes Table S1, Table S2, and Table S3; Figure S1, Figure S2, Figure S3 and Figure S4, plus details of the species tree and BPP analyses.

**Table S1** Species, field, and institutional numbers, locality, geographical coordinates, GenBank accession numbers for ingroups and outgroups samples, and the new data amplified for this study (represented by the GenBank accession numbers starting with 'MW' and in bold). Abbreviations for field series: AAV, Álvaro Andrés Velásquez; AJC, Andrew J. Crawford; CG, Carlos E. Guarnizo; LSB, Lucas Santiago Barrientos; MAR, Marco Antonio Rada. Acronyms for museums are: ANDES-A and ANDES-T, Amphibians Collection and Tissues Collection, Museo de Historia Natural C.J. Marinkelle, Universidad de los Andes, Bogotá, Colombia; MHUA, Museo de Herpetología de la Universidad de Antioquia, Colombia. Explanation of letter codes: eEC (eastern flank Eastern Cordillera), CC (Central Cordillera), wEC (western flank Eastern Cordillera).

| Species                         | Locality (m a.s.l.)    | Geographic region | Clade | Latitude | Longitude | Field number | Institutional number | COI              | 16S              | POMC             | SF232            | SF328            | SF412            |
|---------------------------------|------------------------|-------------------|-------|----------|-----------|--------------|----------------------|------------------|------------------|------------------|------------------|------------------|------------------|
| <i>Rheobates palmatus</i>       | Santa María (870)      | eEC               | SM    | 4.848    | -73.272   | AJC 4235     | ANDES-A 1486         | KJ130 682        | MW5 96297        | KJ130 740        | <b>MW5 96289</b> | <b>MW5 96300</b> | <b>MW5 96247</b> |
|                                 | Santa María (870)      | eEC               | SM    | 4.848    | -73.272   | AJC 4239     | ANDES-A 1487         | KJ130 683        | KJ130 718        | KJ130 742        | <b>MW5 96271</b> | <b>MW5 96301</b> | <b>MW5 96250</b> |
|                                 | Santa María (870)      | eEC               | SM    | 4.858    | -73.264   | AJC 4232     | ANDES-A 1485         | -                | <b>MW5 96298</b> | -                | <b>MW5 96272</b> | <b>MW5 96322</b> | <b>MW5 96248</b> |
|                                 | Santa María (870)      | eEC               | SM    | 4.858    | -73.264   | AJC 4233     | -                    | <b>MW5 96296</b> | <b>MW5 96299</b> | <b>MW59 6292</b> | <b>MW5 96290</b> | <b>MW5 96302</b> | <b>MW5 96249</b> |
| <i>Rheobates pseudopalmaris</i> | Amalfi (1550)          | CC                | CC    | 6.800    | -75.086   | MHUA 4732    | MHUA 4732            | KJ130 692        | KJ130 726        | KJ130 746        | <b>MW5 96288</b> | <b>MW5 96303</b> | <b>MW5 96251</b> |
|                                 | San Rafael (1250)      | CC                | CC    | 6.390    | -75.011   | LSB 337      | Voucher lost         | KJ130 679        | KJ130 715        | KJ130 738        | -                | -                | <b>MW5 96252</b> |
|                                 | Maceo (575)            | CC                | CC    | 6.547    | -74.644   | MHUA 4348    | MHUA 4348            | KJ130 678        | KJ130 713        | KJ130 737        | <b>MW5 96276</b> | <b>MW5 96318</b> | <b>MW5 96253</b> |
|                                 | Anorí (1530)           | CC                | CC    | 6.978    | -75.111   | MHUA 5162    | MHUA 5162            | KJ130 694        | KJ130 727        | KJ130 747        | <b>MW5 96277</b> | <b>MW5 96319</b> | <b>MW5 96254</b> |
|                                 | Anorí (1530)           | CC                | CC    | 6.978    | -75.111   | MHUA 5357    | MHUA 5357            | KJ130 695        | KJ130 728        | <b>MW59 6293</b> | <b>MW5 96287</b> | <b>MW5 96320</b> | <b>MW5 96255</b> |
| <i>Rheobates palmatus</i>       | San Vicente (300)      | wEC               | EC    | 7.079    | -73.552   | AJC 3526     | ANDES-A 1481         | KJ130 670        | KJ130 706        | KJ130 733        | <b>MW5 96278</b> | <b>MW5 96309</b> | <b>MW5 96258</b> |
|                                 | Virolín (1748)         | wEC               | EC    | 6.105    | -73.199   | CG 001       | ANDES-T 2350         | KJ130 681        | KJ130 716        | KJ130 739        | <b>MW5 96283</b> | <b>MW5 96317</b> | <b>MW5 96259</b> |
|                                 | Puente Nacional (1623) | wEC               | EC    | 5.882    | -73.678   | AJC 3398     | ANDES-A 1476         | KJ130 665        | KJ130 701        | KJ130 729        | <b>MW5 96284</b> | <b>MW5 96314</b> | <b>MW5 96260</b> |
|                                 | Puente Nacional (1623) | wEC               | EC    | 5.882    | -73.678   | AJC 3403     | ANDES-A 1478         | KJ130 690        | KJ130 724        | <b>MW59 6294</b> | <b>MW5 96285</b> | <b>MW5 96315</b> | <b>MW5 96261</b> |
|                                 | Puente Nacional (1623) | wEC               | EC    | 5.882    | -73.678   | AJC 3404     | ANDES-A 1479         | KJ130 676        | KJ130 711        | <b>MW59 6295</b> | <b>MW5 96286</b> | <b>MW5 96316</b> | <b>MW5 96262</b> |
|                                 | Piedecuesta (940)      | wEC               | EN    | 6.783    | -73.017   | AAV153       | ANDES-A 1472         | KJ130 685        | KJ130 720        | KJ130 743        | <b>MW5 96279</b> | <b>MW5 96304</b> | <b>MW5 96263</b> |
|                                 | Piedecuesta (940)      | wEC               | EN    | 6.783    | -73.017   | AAV 154      | ANDES-A 1473         | KJ130 688        | KJ130 722        | KJ130 744        | <b>MW5 96281</b> | <b>MW5 96306</b> | <b>MW5 96265</b> |

|                              |                      |     |           |       |         |          |              |           |           |           |                  |                  |                  |
|------------------------------|----------------------|-----|-----------|-------|---------|----------|--------------|-----------|-----------|-----------|------------------|------------------|------------------|
|                              | Piedecuesta (940)    | wEC | EN        | 6.783 | -73.017 | AJC 3860 | ANDES-A 1482 | KJ130 666 | KJ130 702 | KJ130 730 | -                | <b>MW5 96305</b> | <b>MW5 96266</b> |
|                              | Suratá (1740)        | wEC | EN        | 7.367 | -72.983 | CG 003   | ANDES-T 2352 | KJ130 675 | KJ130 709 | KJ130 735 | <b>MW5 96280</b> | <b>MW5 96307</b> | <b>MW5 96264</b> |
|                              | Suratá (1740)        | wEC | EN        | 7.367 | -72.983 | CG 004   | ANDES-T 2353 | KJ130 672 | KJ130 708 | -         | <b>MW5 96282</b> | <b>MW5 96308</b> | <b>MW5 96267</b> |
|                              | San Francisco (1749) | wEC | ES        | 4.996 | -74.270 | AAV 167  | AAV 167      | KJ130 669 | -         | KJ130 732 | -                | <b>MW5 96321</b> | <b>MW5 96270</b> |
|                              | Icononzo (1285)      | wEC | ES        | 4.185 | -74.547 | MAR217 5 | MAR2175      | -         | KJ130 717 | KJ130 741 | <b>MW5 96273</b> | <b>MW5 96310</b> | <b>MW5 96268</b> |
|                              | Cáqueza (1515)       | eEC | ES        | 4.414 | -73.948 | CG 007   | ANDES-T 2354 | KJ130 684 | KJ130 719 | KJ871 617 | <b>MW5 96274</b> | <b>MW5 96311</b> | <b>MW5 96256</b> |
|                              | Cáqueza (1515)       | eEC | ES        | 4.414 | -73.948 | CG 013   | ANDES-T 2355 | KJ130 677 | KJ130 712 | KJ130 736 | <b>MW5 96291</b> | <b>MW5 96312</b> | <b>MW5 96269</b> |
|                              | Las Brisas (2000)    | eEC | ES        | 4.437 | -73.919 | AJC 2106 | ANDES-A 1474 | KJ130 668 | KJ130 704 | KJ130 731 | <b>MW5 96275</b> | <b>MW5 96313</b> | <b>MW5 96257</b> |
| <i>Allobates aff. juanii</i> | Sabanalarga (320)    | -   | Out group | 4.773 | -73.038 | AJC 3383 | ANDES-A 1073 | KJ130 661 | KJ130 697 | KJ871 619 | -                | -                | -                |
| <i>Allobates femoralis</i>   | El Once (90)         | -   | Out group | 4.117 | -69.950 | AJC 3598 | ANDES-A 1471 | KJ130 660 | KJ130 696 | KJ871 618 | -                | -                | -                |

**Table S2** Conditions used for PCR amplification. For the mitochondrial and POMC markers, the same conditions used by Muñoz-Ortíz *et al.* (2015) were implemented here (Appendix S1; Table S2). To amplify the other three nuclear genes, we used an initial denaturing step of 2 min at 95 °C followed by 30 amplification cycles (30 s at 95 °C, 30 s at 51 °C, 60 s at 73 °C) and a final extension of 20 min at 72 °C. PCR products were cleaned with exonuclease I and SAP enzymes (Werle *et al.* 1994), and sequenced directly with Sanger technology.

| Gene region                          | Primer      | Primer sequence (5'-3')                | Source                            |
|--------------------------------------|-------------|----------------------------------------|-----------------------------------|
| Mitochondrial<br><i>COI</i> (658 bp) | dgLCO-1490  | GGT CAA CAA ATC ATA<br>AAG AYA TYG G   | (Meyer &<br>Paulay, 2005)         |
|                                      | dhHCO-2198  | TAA ACT TCA GGG TGA<br>CCA AAR AAY CA  |                                   |
|                                      | Chmf4       | TYT CWA CWA AYC AYA<br>AAG AYA TCG G   | (Che <i>et al.</i> ,<br>2012)     |
|                                      | Chmr4       | ACY TCR GGR TGR CCR<br>AAR AAT CA      |                                   |
| Mitochondrial<br><i>16S</i> (569 bp) | Sar-L       | CGC CTG TTT ATC AAA<br>AAC AT          | (Kessing <i>et al.</i> ,<br>2004) |
|                                      | Sbr-H       | CCG GTC TGA ACT CAG<br>ATC ACG T       |                                   |
| Nuclear<br><i>POMC</i> (472<br>bp)   | POMC_DRV_R1 | GGR RTT YTT GAA WAG<br>AGT CAT TAG WGG | (Vieites <i>et al.</i> ,<br>2007) |
|                                      | POMC_DRV_F1 | ATA TGT CAT GAS CCA<br>YTT YCG CTG GAA |                                   |
| Nuclear <i>SF232</i><br>(375 bp)     | SF232 F     | AGT CAT AAT GGT GCC<br>ACT AAA AG      | (Tezuka <i>et al.</i> ,<br>2012)  |
|                                      | SF232 R     | TGT GGT CCT TGT ATG<br>GGT TG          |                                   |
| Nuclear <i>SF328</i><br>(404 bp)     | SF328 F     | CCC AAA AGA AGT TTT<br>GCT GA          | (Tezuka <i>et al.</i> ,<br>2012)  |
|                                      | SF328 R     | GCC TCA CAA ACA ACC<br>ACA GA          |                                   |
| Nuclear <i>SF412</i><br>(352 bp)     | SF412 F     | ACC ATC CTC ACT GTG<br>ACA CC          | (Tezuka <i>et al.</i> ,<br>2012)  |
|                                      | SF412 R     | TCT TTG GCA AAC TGG<br>ACC TT          |                                   |

**Table S3** Best-fit partitioning scheme and models of nucleotide substitution for each of the partitions of the genes included in this study, as inferred by the corrected Akaike information criterion (AICc) implemented in PartitionFinder 2. The abbreviation ‘pos.’ refers to codon position.

| <b>Partition number</b> | <b>Partition</b>           | <b>Best model</b>  |
|-------------------------|----------------------------|--------------------|
| 1                       | 16S                        | GTR + $\Gamma$     |
| 2                       | COI pos. 3                 | TRN + $\Gamma$     |
| 3                       | COI pos. 1                 | TRNEF + $\Gamma$   |
| 4                       | COI pos. 2                 | F81 + $\Gamma$     |
| 5                       | POMC pos. 2                | TRN + I            |
| 6                       | POMC pos. 3                | SYM                |
| 7                       | POMC pos. 1                | HKY                |
| 8                       | SF412 pos. 3               | HKY + $\Gamma$     |
| 9                       | SF412 pos. 1, SF412 pos. 2 | F81 + I            |
| 10                      | SF328                      | K81 + I + $\Gamma$ |
| 11                      | SF232 pos. 3               | TVMEF + I          |
| 12                      | SF232 pos. 1               | F81                |
| 13                      | SF232 pos. 2               | F81 + I            |

**Figure S1.** ML concatenated tree inferred for the mitochondrial genes, 16S and COI, of the populations of *Rheobates* spp., as inferred using the software RAxML. The phylogenetic tree was constructed using the standard GTRGAMMA substitution model for each of the partitions recommended by PartitionFinder2. Tree searching involved 1000 replicate searches to find the optimal ML tree, followed by a bootstrap analysis using the autoMRE option, which automatically determines a sufficient number of bootstrap replicates. Numbers next to each node indicate bootstrap support values. The scale bar represents the inferred number of substitutions per site or branch length. Specimens are indicated by their field or museum voucher number, as summarized in supporting Table S1.

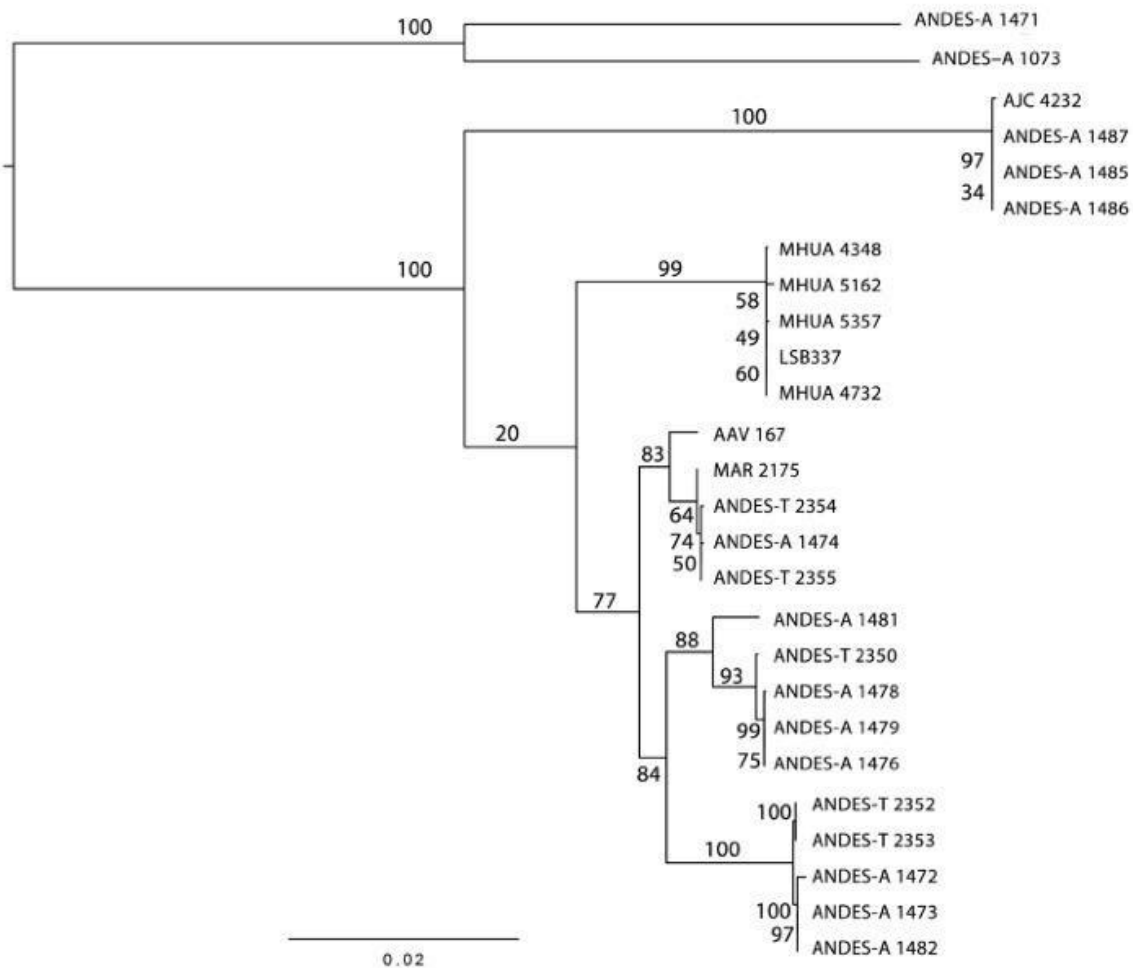

**Figure S2.** ML concatenated gene tree inferred for the four nuclear genomic markers, POMC, SF232, SF328, and SF412 from populations of *Rheobates* spp., as inferred using the software RAxML. The phylogenetic tree was constructed using the standard GTRGAMMA substitution model for each of the partitions recovered by PartitionFinder2. Tree searches involved 1000 replicate searches to find the optimal ML tree, followed by a bootstrap analysis using the autoMRE option, which automatically determines a sufficient number of bootstrap replicates. Numbers above each branch indicate bootstrap support values for the descending node. The scale bar represents the average number of substitutions per site or branch length. Specimens are indicated by their field or museum voucher number, as summarized in supporting Table S1.

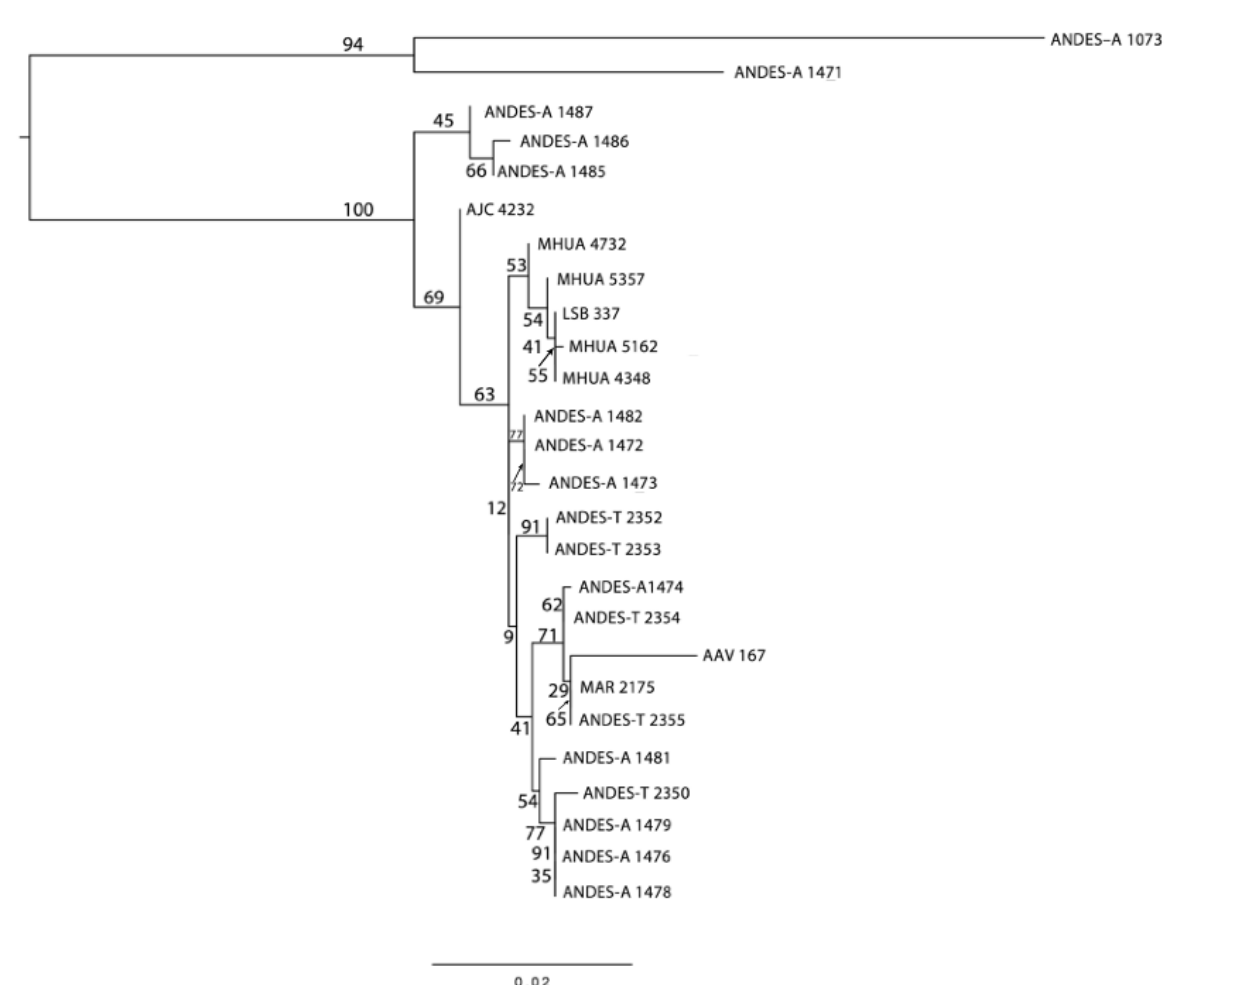

**Figure S3.** StarBEAST2 multispecies coalescent tree of the five major clades of the frog genus *Rheobates* inferred in this study, as obtained from the sequences of two mitochondrial genes (16S and COI) and four nuclear genes (POMC, SF232, SF328, and SF412). See main text for details of the analysis. Numbers to the right of each node correspond to the Bayesian posterior probabilities of the subtended clade. The scale bar represents the average number of substitutions per site or branch length. Specimens are indicated by their field or museum voucher number, as summarized in supporting Table S1.

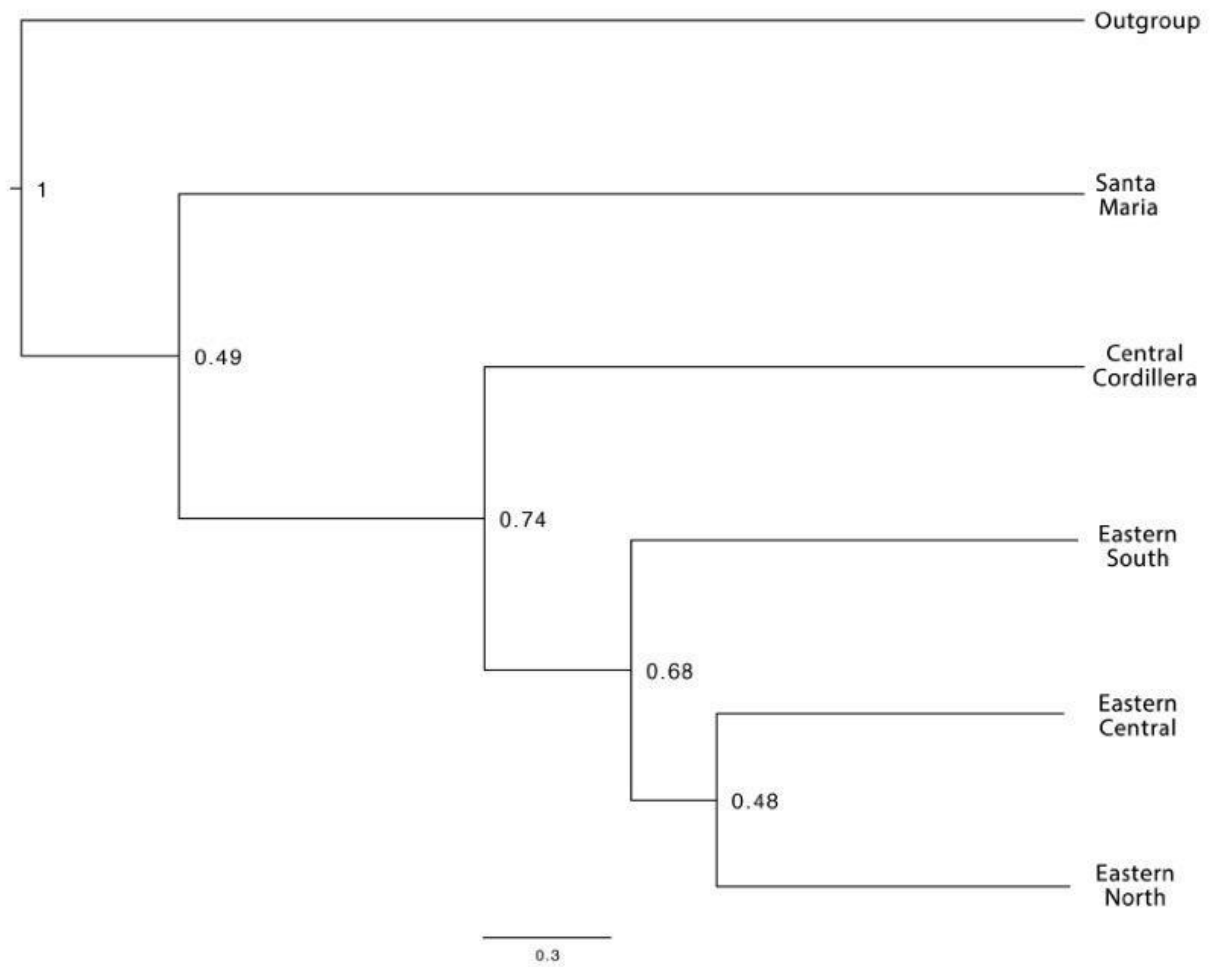



**Figure S4. a.** Relationship between geographic distance in kilometers (km) and mitochondrial DNA distance (concatenated COI and 16S genes). **b.** Relationship between environmental distance based on WorldClim layers and mitochondrial distances (COI+16S).

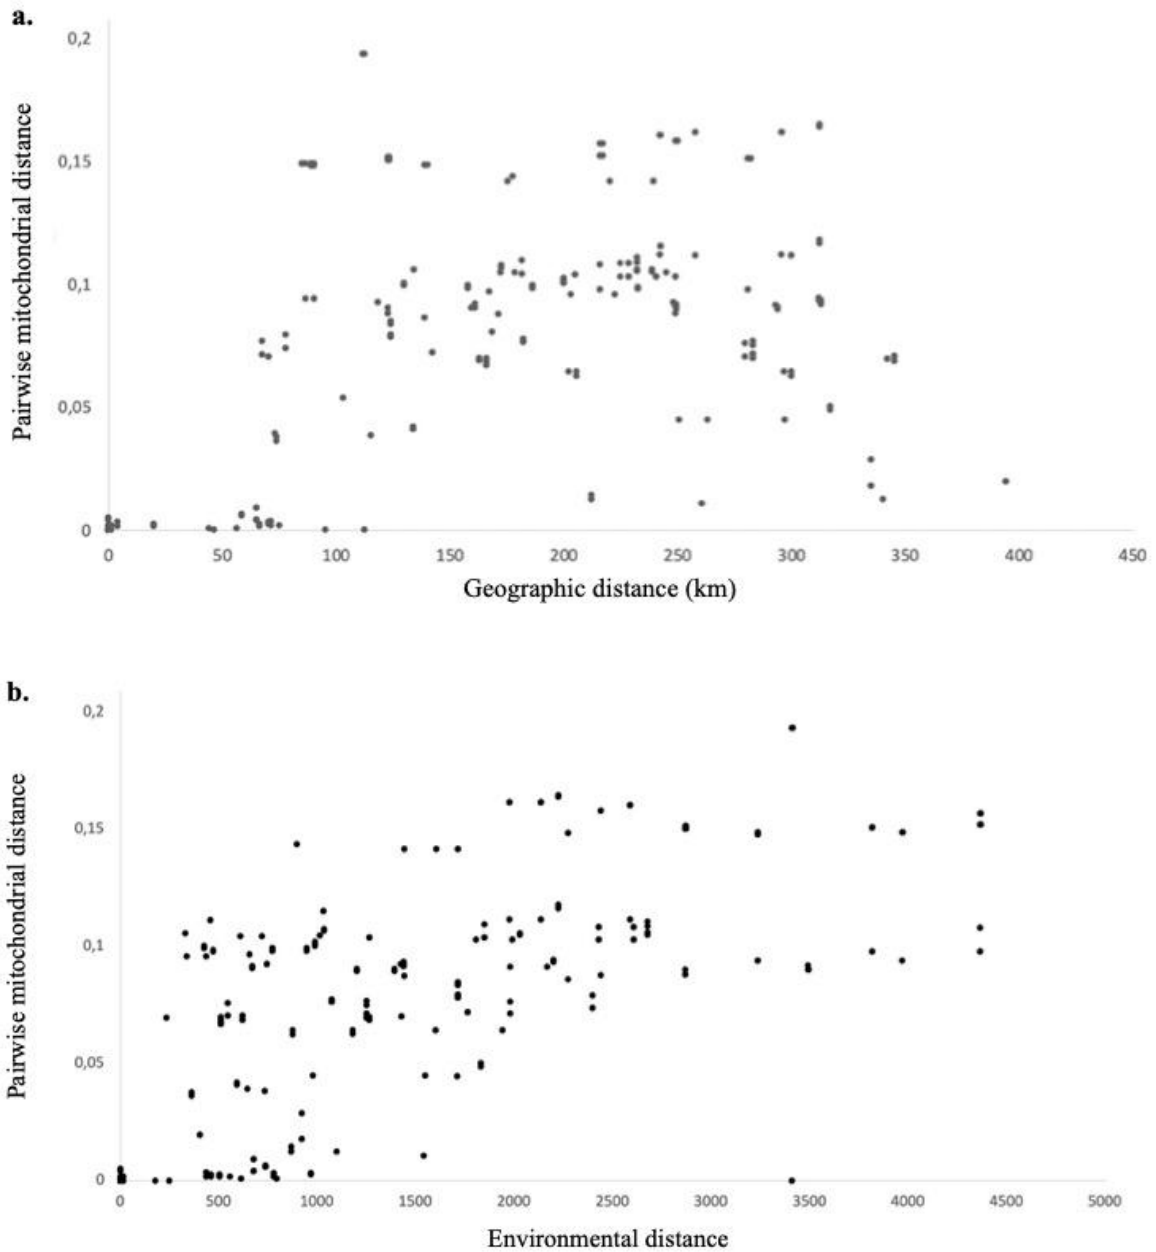

## **Species tree inference**

We estimated the posterior distribution of trees, including dates and rates, by assuming a birth-death model tree prior (a diversification model that considers both speciation and extinction; Gernhard, 2018) and a random local clock model of evolution (Drummond & Suchard, 2010). Our prior distribution on the substitution rate of the mitochondrial genes assumed a lognormal distribution with a mean of 0.0155 substitutions per lineage per million years (Gehara, Summers & Brown, 2013) with upper and lower bounds of the central 95% prior density of 0.0131 and 0.0182, respectively. We set StarBEAST2 to estimate the substitution rate of each nuclear gene under a  $1/X$  distribution with an offset of 0.

## **Species delimitation analysis (BPP)**

To test for the species delimitation we used Bayesian Phylogenetics and Phylogeography (BPP) version 3.2 (Yang, 2015). We assumed three contrasting sets of prior distributions on demographic parameters representing three types of histories: small population size with shallow divergence among species  $\theta \sim \Gamma(2, 2000)$ ,  $\tau_0 \sim \Gamma(2, 2000)$ ; large population size with deep divergence  $\theta \sim \Gamma(1, 10)$ ,  $\tau_0 \sim \Gamma(1, 10)$ ; and large population size with shallow divergences  $\theta \sim \Gamma(1, 10)$ ,  $\tau_0 \sim \Gamma(2, 2000)$ , where  $\theta$  is the population mutation rate (proportional to population size),  $\tau$  is the population divergence time, and  $\Gamma$  indicates a gamma distribution with (shape, scale) parameters (Flouri, Jiao, Rannala & Yang, 2018; Yang, 2015). For other divergence time parameters, we assigned a Dirichlet prior (Yang & Rannala, 2010: equation 2). We used the ‘A10’ analysis (species delimitation = 1, species tree = 0) which uses the reversible-jump MCMC algorithm and used the uniform rooted tree (species model prior = 1), and left the automatic fine-tuning of the MCMC. Considering that estimating different mutation rates would

not affect the Bayesian comparison and would instead be more of a computational burden, we decided to assume the same mutation rate for all loci (locus rate = 0). Given that the reversible jump MCMC algorithm can exhibit mixing problems in some datasets (Yang, 2015; Rannala & Yang, 2013; Yang & Rannala, 2010), we repeated the analysis under each scenario three times, with different starting seeds, to confirm consistency among runs.

## References

- Drummond, A. J., & Suchard, M. A. (2010). Bayesian random local clocks, or one rate to rule them all. *BMC Biology*, *8*(1), 1-12. DOI: 10.1186/1741-7007-8-114
- Flouri, T., Jiao, X., Rannala, B., & Yang, Z. (2018). Species tree Inference with BPP using genomic sequences and the multispecies coalescent. *Molecular Biology and Evolution*, *35*(10), 2585–2593. DOI: 10.1093/molbev/msy147
- Gehara, M., Summers, K., & Brown, J. L. (2013). Population expansion, isolation and selection: novel insights on the evolution of color diversity in the strawberry poison frog. *Evolutionary Ecology*, *27*(4), 797-824. DOI: 10.1007/s10682-013-9652-0
- Gernhard, T. (2008). The conditioned reconstructed process. *Journal of Theoretical Biology*, *253*(4), 769–778. DOI: 10.1016/j.jtbi.2008.04.005
- Rannala, B., & Yang, Z. (2013). Improved reversible jump algorithms for Bayesian species delimitation. *Genetics*, *194*(1), 245–253. DOI: 10.1534/genetics.112.149039
- Yang, Z. (2015). The BPP program for species tree estimation and species delimitation. *Current Zoology*, *61*(5), 854–865. DOI: 10.1093/czoolo/61.5.854
- Yang, Z., & Rannala, B. (2010). Bayesian species delimitation using multilocus sequence data. *Proceedings of the National Academy of Sciences*, *107*(20), 9264–9269. DOI: 10.1073/pnas.0913022107
